# Supplementary material for: Eradicating mass spectrometric glycan rearrangement by utilizing free radicals
Source: PubMed Central journal article supplement (PMC6020757; doi:10.1039/c6sc01371f), 2016-05-05
Supplement: SC-007-C6SC01371F-s001.pdf [file SC-007-C6SC01371F-s001.pdf]

# Eradicate Mass Spectrometric Glycan Rearrangement by Utilizing Free Radical

Nikunj Desai,<sup>a</sup> Daniel A. Thomas,<sup>b</sup> Jungeun Lee,<sup>a</sup> Jinshan Gao,<sup>\*a</sup> J. L. Beauchamp<sup>\*b</sup>

<sup>a</sup> Department of Chemistry and Biochemistry, and Center for Quantitative Obesity Research, Montclair State University, Montclair, NJ 07043

<sup>b</sup> Arthur Amos Noyes Laboratory of Chemical Physics, California Institute of Technology, Pasadena, CA 91125

\*To whom correspondence should be addressed: E-mail: [gaoj@montclair.edu](mailto:gaoj@montclair.edu), [jlbchamp@caltech.edu](mailto:jlbchamp@caltech.edu).

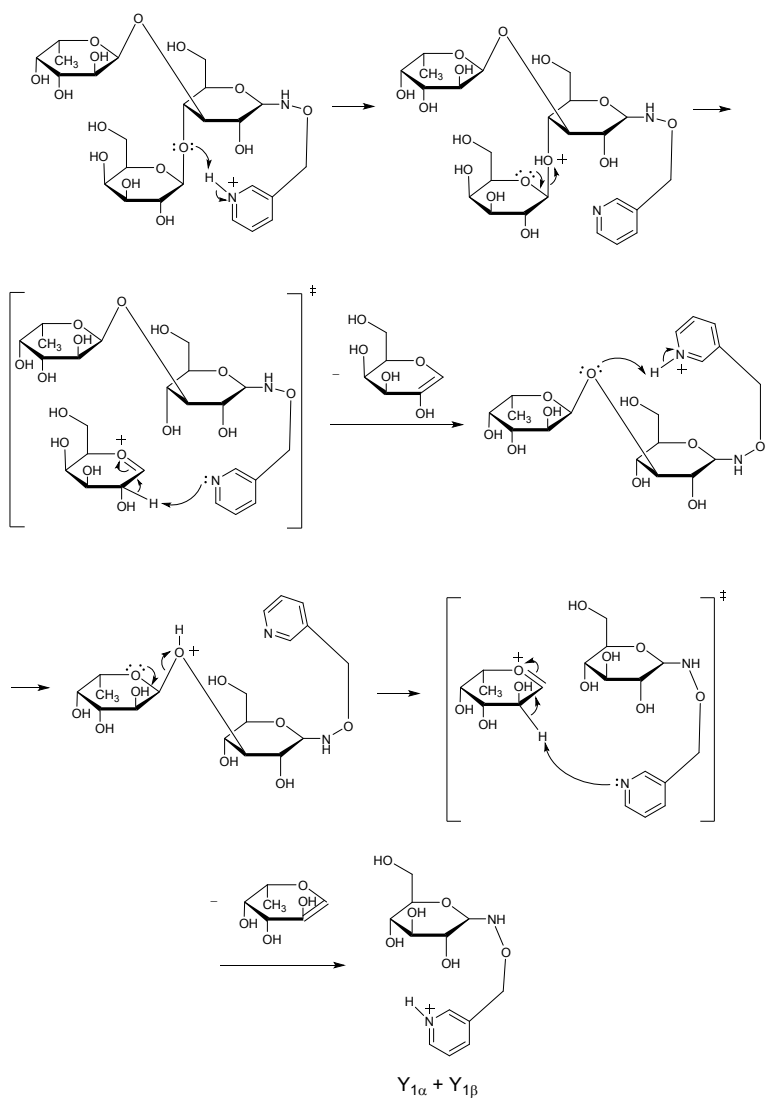

**Scheme S1.** Proposed mechanism for the formation of  $Y_{1\alpha} + Y_{1\beta}$  ion.

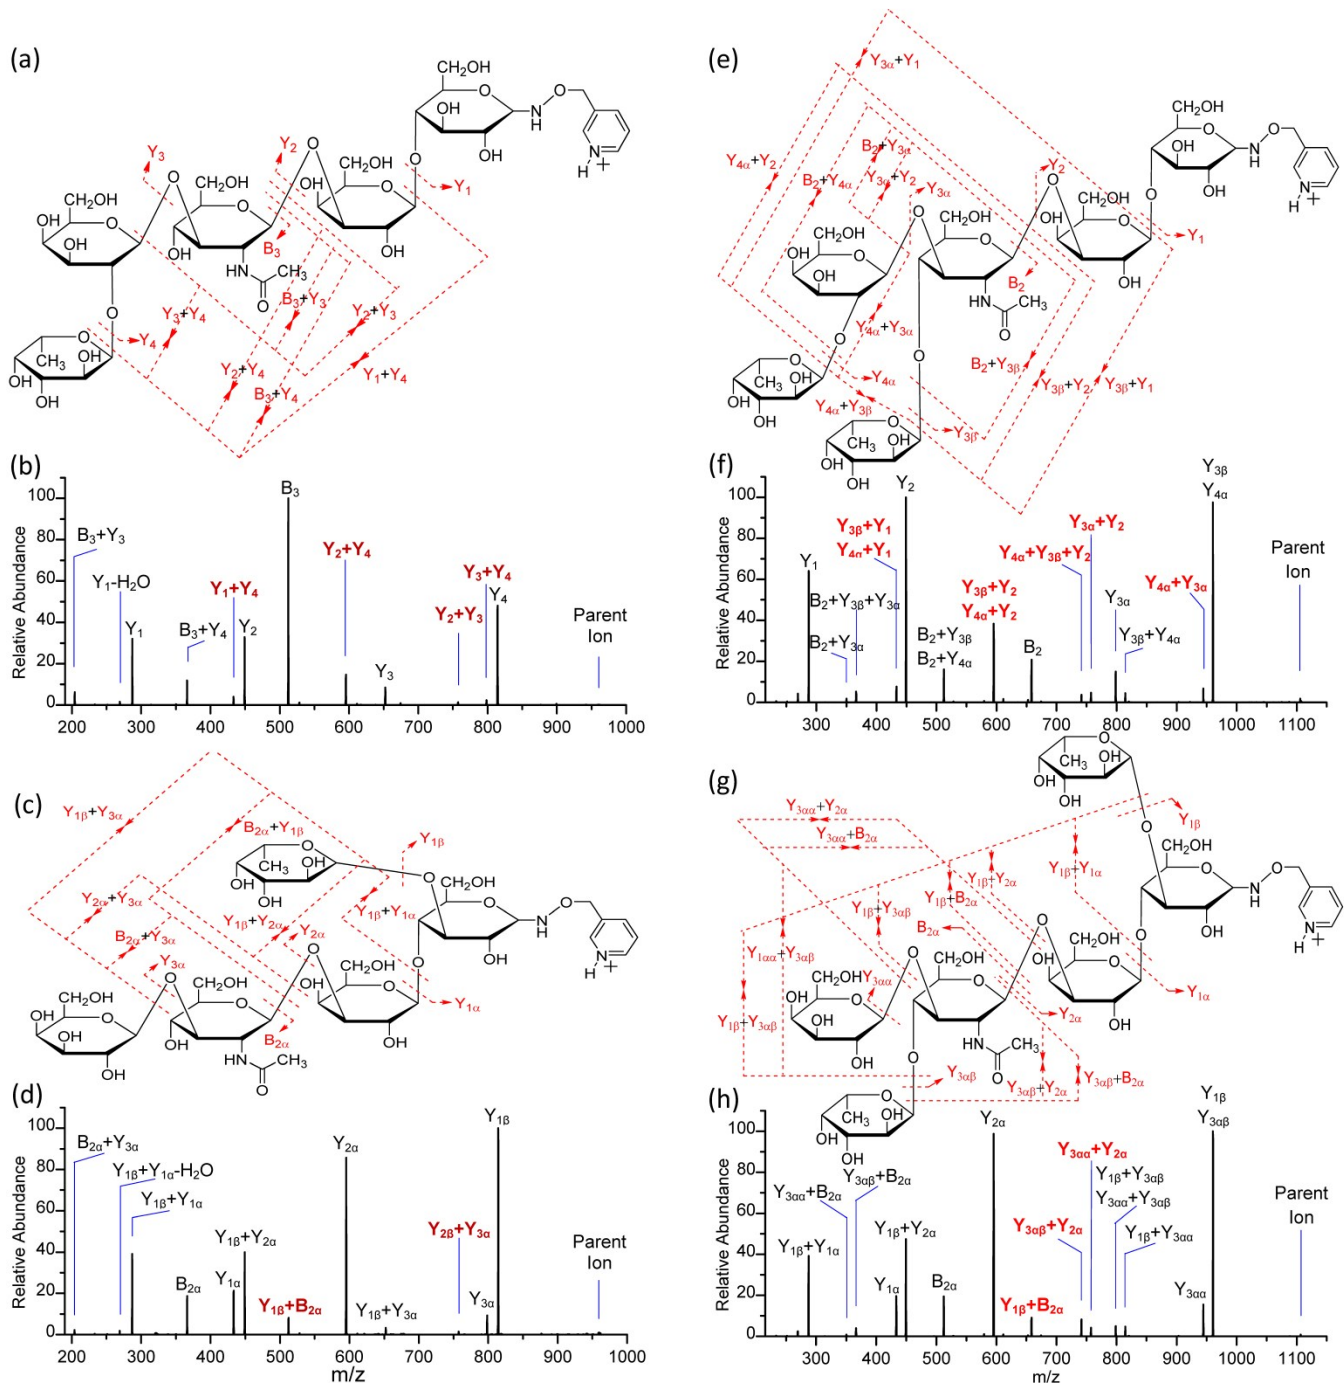

**Figure S1.** The fragmentation patterns observed following CID of singly-protonated PRAGS-derivatized LNFP I (a), LNFP V (c), LNDFH I (e), and LNDFH II (g), and the CID spectra of singly-protonated PRAGS-derivatized LNFP I (a), LNFP V (c), LNDFH I (e), and LNDFH II (g). Parent ion refers to the protonated molecular ion.

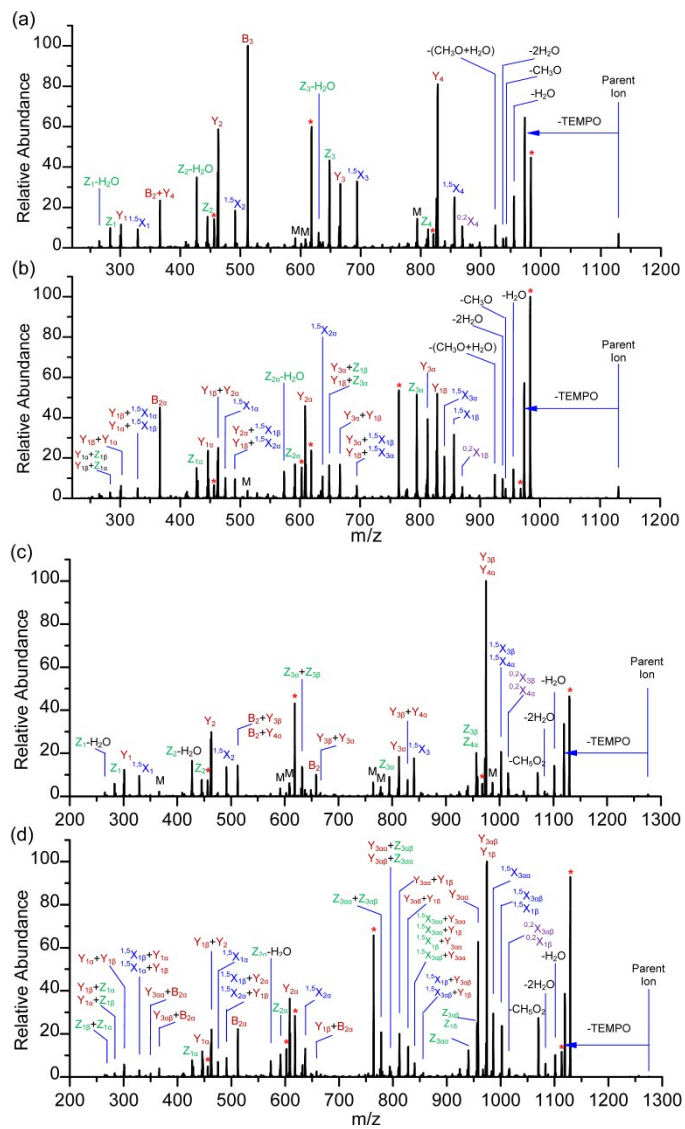

**Figure S2.** The CID spectra of singly-protonated FRAGS-derivatized LNDFH I (a), LNDFH II (b), LNFP I (c), and LNFP V (d). Parent ion refers to the protonated molecular ion.
